# Supplementary figures and images for: Novel application of X-ray fluorescence microscopy (XFM) for the non-destructive micro-elemental analysis of natural mineral pigments on Aboriginal Australian objects
Source: Royal Society of Chemistry journal article supplement (doi:10.1039/c5an02065d), 2016-01-01

Figure 1: Br Elemental Map of Boomerang

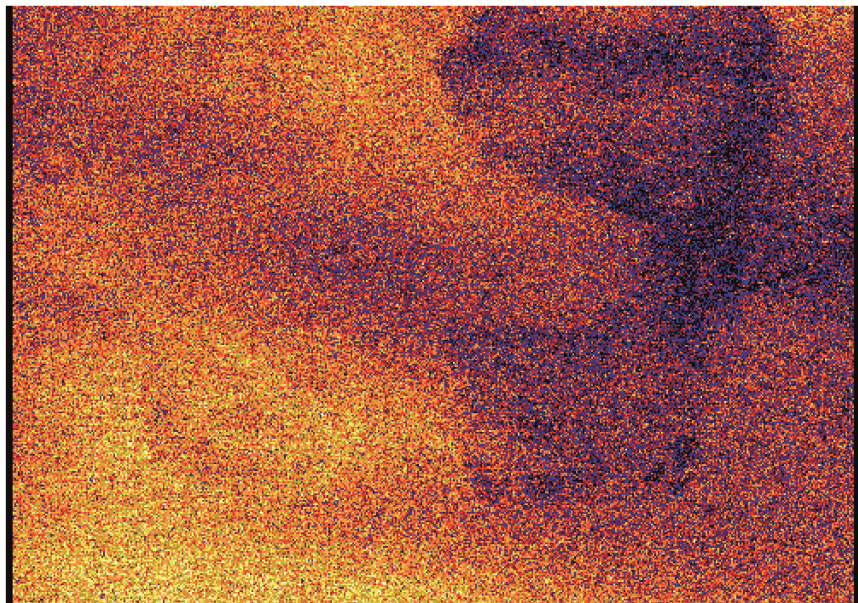

Supplement: c5an02065d1.pdf [file c5an02065d1.pdf]
